# Supplementary material for: The Complex Spatio-Temporal Regulation of the Drosophila Myoblast Attractant Gene duf/kirre
Source: PubMed Central journal article supplement (PMC2734059; doi:10.1371/journal.pone.0006960), 2009-09-09

The complex spatio-temporal regulation of the *Drosophila* myoblast attractant gene *duf/ kirre* (K G Guruharsha et al.)

Supporting data S5: Sequence logos for factors used as priors by Stubb and PhyloGibbs-MP

(For full references / details of construction, see main paper)

bin (from Flyreg)

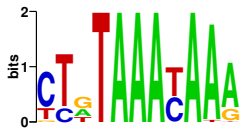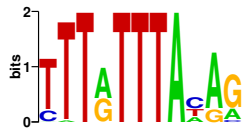

byn (from Flyreg)

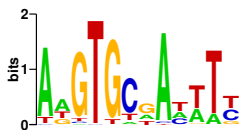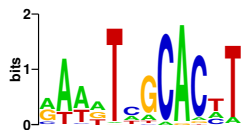

E(spl) (from Flyreg)

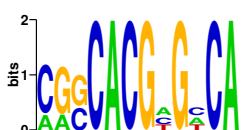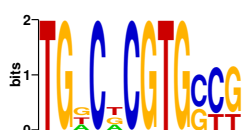

toy (from Flyreg)

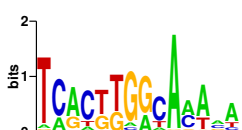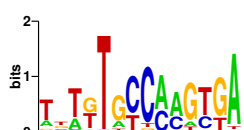

brk (from Flyreg)

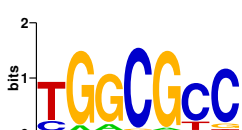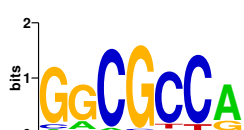

dl (from Flyreg)

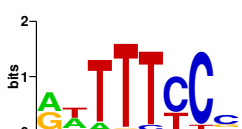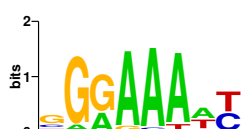

Mad (from Flyreg)

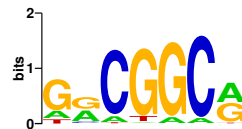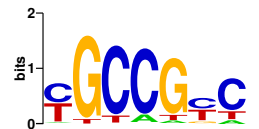

pan (from Flyreg)

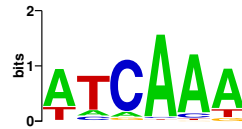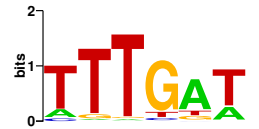

Su(H) (from Flyreg)

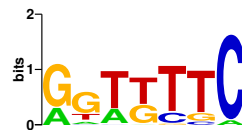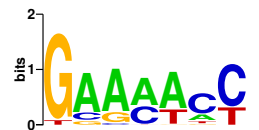

twi (from Flyreg)

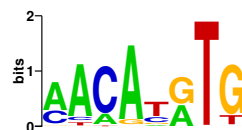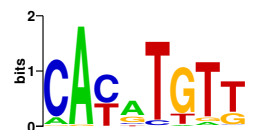

Cf2-II (from Flyreg)

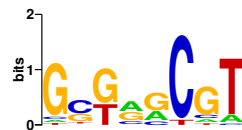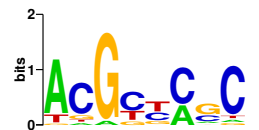

Eip74EF (from Flyreg)

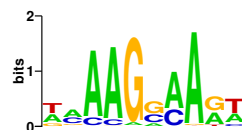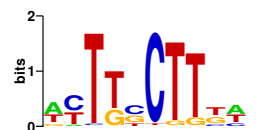

exd (from Flyreg)

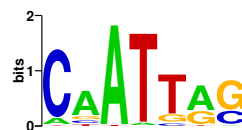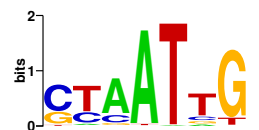

Med (from Flyreg)

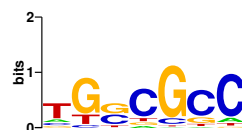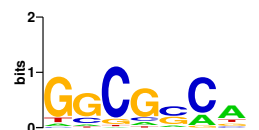

prd (from Flyreg)

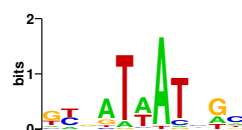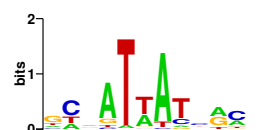

sd (from Flyreg)

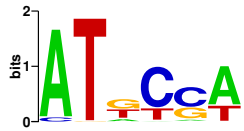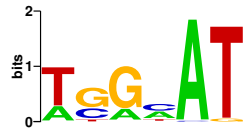

Trl (from Flyreg)

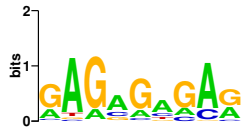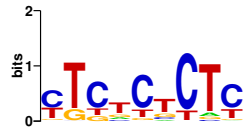

knirps (from B1H data, Noyes et al)

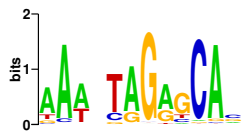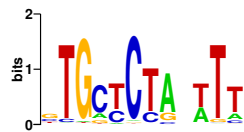

kruppel (from B1H data, Noyes et al)

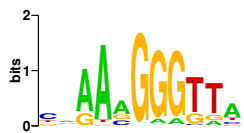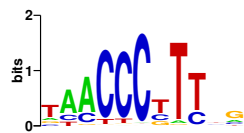

Abd-B homeodomain group (from B1H data, Noyes et al)

et al)

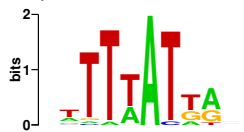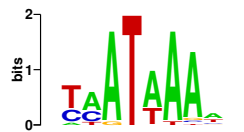

Antp homeodomain group (from B1H data, Noyes et al)

al)

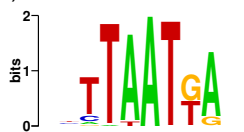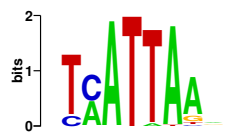

Ap homeodomain group (from B1H data, Noyes et al)

al)

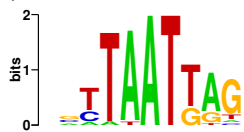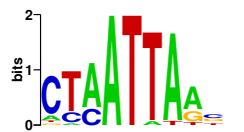

Bcd homeodomain group (from B1H data, Noyes et al)

al)

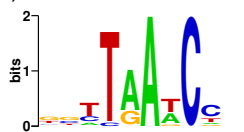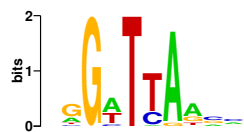

Ladybird homeodomain group (from B1H data, Noyes et al)

Noyes et al)

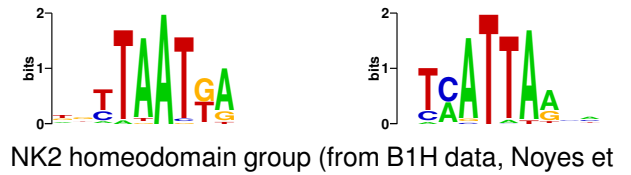

al)

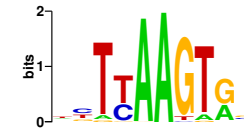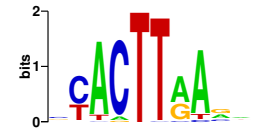

STAT (from Transfac database)

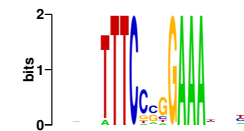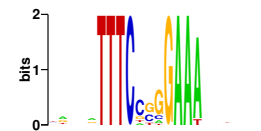

shn1 (from literature)

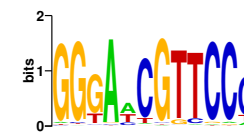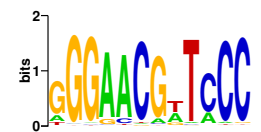

shn2 (from literature)

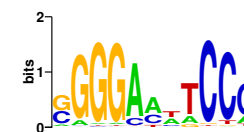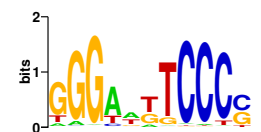

dmef (from literature)

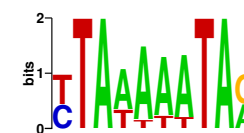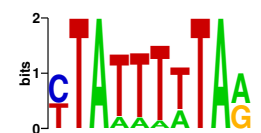

Pnt (from literature)

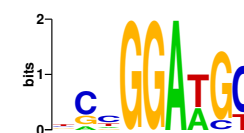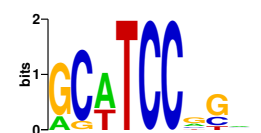

Ci (from consensus sequence)

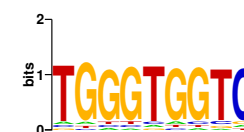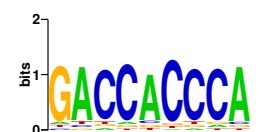

(The following factors were considered but rejected, either because the available weight matrices were not specific enough, or because preliminary runs did not show significant predictions)

br-Z1 (from Flyreg)

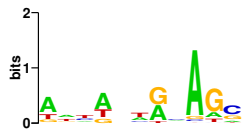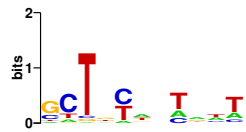

br-Z2 (from Flyreg)

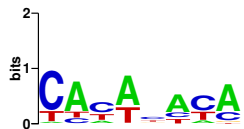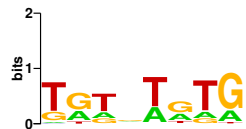

br-Z3 (from Flyreg)

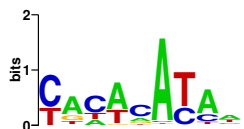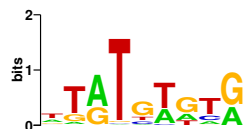

br-Z4 (from Flyreg)

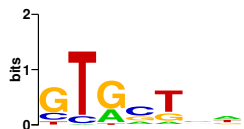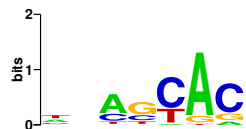

ey (from Flyreg)

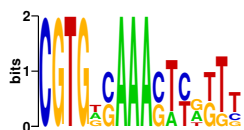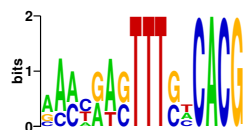

gsb-n (from Flyreg)

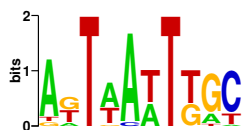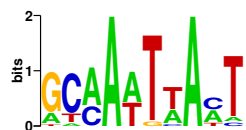

gsb (from Flyreg)

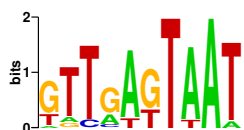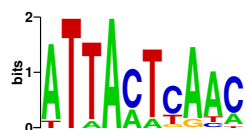

sna (from Flyreg)

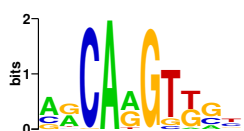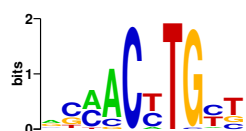

srp (from Flyreg)

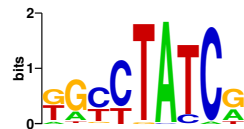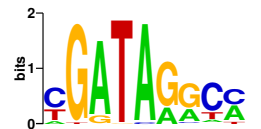

vnd (from Flyreg)

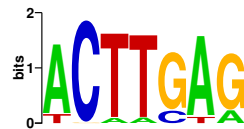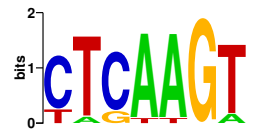

ttk (from B1H data, Noyes et al)

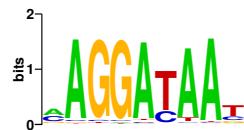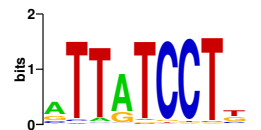

En homeodomain group (from B1H data, Noyes et al)

a)

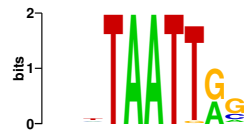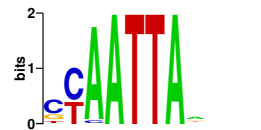

NK1 homeodomain group (from B1H data, Noyes et al)

et al)

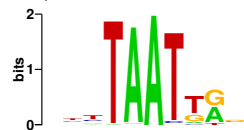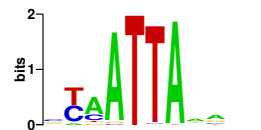

Supplement: pone.0006960.s008.pdf [file pone.0006960.s008.pdf]
