# Supplementary material for: The Complex Spatio-Temporal Regulation of the Drosophila Myoblast Attractant Gene duf/kirre
Source: PLoS One. 2009 Sep 9;4(9):e6960. doi: 10.1371/journal.pone.0006960 (PMC2734059; doi:10.1371/journal.pone.0006960)
Supplement: Datasheet S2 — Conserved TF binding sites in the −10 kb duf upstream sequence between Drosophila melanogaster and Drosophila pseudoobscura. This table lists putative binding sites in the 10 kb upstream of duf from Drosophila melanogaster compared with that of Drosophila pseudoobscura. The + or − sign in the parenthesis indicating the location of the binding site on the coding or non-coding strand in this sequence respectively. Primer binding sites used for cloning are shown in bold green. Light blue and pale green numbers indicate the stretch of sequence identical between the two genomes. Sites highlighted in red (signaling pathways) and green (transcription factors) are well conserved. Those in orange are weakly conserved; those in light yellow are conserved in position/location and those shown in white are unique to D. melanogaster. (0.11 MB XLS) [file pone.0006960.s002.xls]

## Sheet: Sheet1
Start	Stop	midpoint	strand	Binding site in 10kb duf upstream D. melanogaster		midpoint	location	strand	Binding site in 10kb duf upstream D. pseudoobscura
-9912	-9900	88	(+)	Su(H)
-9958	-9946	48	(+)	Hunchback, early maternal and zygotic zinc finger gene, activated by bicoid
-9934	-9922	72	(+)	Hunchback, early maternal and zygotic zinc finger gene, activated by bicoid
-9912	-9900	94	(+)	Suppressor of Hairless, linked to notch pathway
		126
		154
-9802	-9794	202	(+)	CF2-II, Zinc finger splice variant II
-9801	-9793	203	(-)	CF2-II, Zinc finger splice variant II
-9799	-9791	205	(-)	CF2-II, Zinc finger splice variant II
-9798	-9790	206	(+)	CF2-II, Zinc finger splice variant II
-9797	-9789	207	(-)	CF2-II, Zinc finger splice variant II
-9796	-9788	208	(+)	CF2-II, Zinc finger splice variant II
-9795	-9787	209	(-)	CF2-II, Zinc finger splice variant II
-9794	-9786	210	(+)	CF2-II, Zinc finger splice variant II
-9793	-9785	211	(-)	CF2-II, Zinc finger splice variant II
-9792	-9784	212	(+)	CF2-II, Zinc finger splice variant II
-9791	-9783	213	(-)	CF2-II, Zinc finger splice variant II
-9790	-9782	214	(+)	CF2-II, Zinc finger splice variant II
-9789	-9781	215	(-)	CF2-II, Zinc finger splice variant II
-9788	-9780	216	(+)	CF2-II, Zinc finger splice variant II
-9787	-9779	217	(-)	CF2-II, Zinc finger splice variant II
-9786	-9778	218	(+)	CF2-II, Zinc finger splice variant II
-9785	-9777	219	(-)	CF2-II, Zinc finger splice variant II
-9784	-9776	220	(+)	CF2-II, Zinc finger splice variant II
-9783	-9775	221	(-)	CF2-II, Zinc finger splice variant II
-9782	-9774	222	(+)	CF2-II, Zinc finger splice variant II
-9781	-9773	223	(-)	CF2-II, Zinc finger splice variant II
-9776	-9751	224	(+)	duf 9.8 FEx
-9703	-9693	302	(+)	Dorsal, protein for dorso-ventral axis formation, homologous to vertebrate c-rel
-9697	-9685	309	(-)	Drosophila gap gene knirps, involved in embryonic segmentation
-9681	-9661	329	(-)	heat shock factor (Drosophila)
-9676	-9664	330	(+)	Drosophila gap gene knirps, involved in embryonic segmentation
-9615	-9599	393	(-)	Broad-Complex Z2 Zinc Finger isoform
-9585	-9577	419	(-)	CF2-II, Zinc finger splice variant II
-9574	-9562	432	(+)	Drosophila gap gene knirps, involved in embryonic segmentation
-9557	-9545	449	(+)	fushi tarazu, involved in body segmentation of the drosophila embryo
-9538	-9526	468	(+)	fushi tarazu, involved in body segmentation of the drosophila embryo
-9515	-9505	490	(-)	Krueppel, zinc finger protein, involved in body segmentation of the drosophila embryo
-9477	-9438	523	(+)	duf 9.5 FEx
		545		Ets sites
		555				0
-9448	-9434	559	(-)	E74A early ecdysone-inducible gene in onset of Drosophila metamorphosis
-9429	-9415	578	(-)	Snail zinc finger protein, involved in dorso-ventral patterning
		583				28
-9421	-9411	584	(+)	Dorsal, protein for dorso-ventral axis formation, homologous to vertebrate c-rel
		623				91
		642				110
						151	145 - 157	(-)	glial cells missing
						166	160 - 172	(+)	glial cells missing
		736				209
		742		Brk repressor		216			Brk repressor
-9263	-9249	744	(-)	PHO (pleiohomeotic) and PHO-like, polycomp group proteins (PcG) binding to PREs (polycomb group response elements)		218	211 - 225	(-)	PHO (pleiohomeotic) and PHO-like, polycomp group proteins (PcG) binding to PREs (polycomb group response elements)
		789				262
-9216	-9206	789	(+)	Dorsal, protein for dorso-ventral axis formation, homologous to vertebrate c-rel
-9128	-9118	877	(+)	Dorsal, protein for dorso-ventral axis formation, homologous to vertebrate c-rel
-9092	-9080	914	(+)	glial cells missing
-9063	-9043	947	(+)	heat shock factor (Drosophila)
-9044	-9024	966	(-)	heat shock factor (Drosophila)		273	268 - 278	(+)	drosophila T-cell factor, homolog of TCF/LEF, interacts with Armadillo (b-Catenin homolog
-8989	-8977	1017	(-)	fushi tarazu, involved in body segmentation of the drosophila embryo		281	274 - 288	(+)	PHO (pleiohomeotic) and PHO-like, polycomp group proteins (PcG) binding to PREs (polycomb group response elements)
-8978	-8968	1027	(+)	drosophila T-cell factor, homolog of TCF/LEF, interacts with Armadillo (b-Catenin homolog		318	313 - 323	(+)	drosophila T-cell factor, homolog of TCF/LEF, interacts with Armadillo (b-Catenin homolog
-8962	-8942	1048	(+)	heat shock factor (Drosophila)		362	354 - 370	(-)	Broad-Complex Z4 Zinc Finger isoform
-8932	-8912	1078	(-)	Drosophila paired homeodomain		362	356 - 368	(-)	Crocodile regulator of head development, member of fork head domain protein family
-8924	-8912	1082	(-)	fushi tarazu, involved in body segmentation of the drosophila embryo
-8891	-8881	1114	(+)	Dorsal, protein for dorso-ventral axis formation, homologous to vertebrate c-rel
-8893	-8873	1117	(-)	heat shock factor (Drosophila)		366	356 - 376	(-)	heat shock factor (Drosophila)
-8881	-8871	1124	(+)	Dorsal, protein for dorso-ventral axis formation, homologous to vertebrate c-rel		371	361 - 381	(-)	heat shock factor (Drosophila)
-8837	-8829	1167	(+)	CF2-II, Zinc finger splice variant II
-8741	-8731	1264	(-)	Krueppel, zinc finger protein, involved in body segmentation of the drosophila embryo
		1290				490
-8712	-8700	1294	(-)	fushi tarazu, involved in body segmentation of the drosophila embryo
		1313				493
-8694	-8680	1313	(+)	signal transducers and activators of transcription		564	558 - 570	(+)	Bicoid, maternal effect gene in drosophila embryogenesis
-8694	-8680	1313	(-)	signal transducers and activators of transcription		577	571 - 583	(-)	Drosophila gap gene knirps, involved in embryonic segmentation
-8683	-8673	1322	(+)	Zeste transvection gene product		578	568 - 588	(+)	heat shock factor (Drosophila)
-8637	-8621	1371	(+)	Broad-Complex Z2 Zinc Finger isoform		587	581 - 593	(+)	Hunchback, early maternal and zygotic zinc finger gene, activated by bicoid
-8634	-8618	1374	(+)	Broad-Complex Z2 Zinc Finger isoform		643	633 - 653	(-)	heat shock factor (Drosophila)
-8629	-8617	1377	(-)	Drosophila gap gene knirps, involved in embryonic segmentation		653	647 - 659	(-)	Drosophila gap gene knirps, involved in embryonic segmentation
						659	649 - 669	(+)	heat shock factor (Drosophila)
-8625	-8613	1381	(+)	Hunchback, early maternal and zygotic zinc finger gene, activated by bicoid		661	656 - 666	(+)	Zeste transvection gene product
-8567	-8559	1437	(-)	Drosophila gap gene tailless, involved in embryonic segmentation		665	659 - 671	(+)	Suppressor of Hairless, linked to notch pathway
-8571	-8551	1439	(+)	Drosophila PAX6 P3 homeodomain binding site		721	714 - 728	(+)	GAGA factor encoded by the Trithorax-like gene (Trl)
-8558	-8534	1442	(+)	duf 8.6 FEx		727	720 - 734	(+)	GAGA factor encoded by the Trithorax-like gene (Trl)
-8537	-8517	1473	(+)	heat shock factor (Drosophila)		728	718 - 738	(+)	heat shock factor (Drosophila)
-8517	-8503	1490	(+)	E74A early ecdysone-inducible gene in onset of Drosophila metamorphosis		738	738 - 748	(-)	Hairy, transcriptional repressor
-8519	-8499	1491	(+)	heat shock factor (Drosophila)		743	738 - 748	(-)	Hairy, transcriptional repressor
-8480	-8466	1527	(+)	E74A early ecdysone-inducible gene in onset of Drosophila metamorphosis		779	773 - 785	(+)	Drosophila gap gene knirps, involved in embryonic segmentation
-8475	-8465	1530	(-)	Dorsal, protein for dorso-ventral axis formation, homologous to vertebrate c-rel		795	791 - 799	(+)	Drosophila gap gene tailless, involved in embryonic segmentation
		1549		Ets sites		844	837 - 851	(-)	E74A early ecdysone-inducible gene in onset of Drosophila metamorphosis
-8454	-8440	1553	(+)	E74A early ecdysone-inducible gene in onset of Drosophila metamorphosis		857	852 - 862	(+)	Dorsal, protein for dorso-ventral axis formation, homologous to vertebrate c-rel
-8429	-8421	1575	(+)	Tramtrack 69K zinc finger protein, binding sites in eve gene		860	850 - 870	(-)	heat shock factor (Drosophila)
-8360	-8340	1650	(-)	Drosophila paired homeodomain		866	860 - 872	(+)	Drosophila gap gene knirps, involved in embryonic segmentation
		1670		Tinman		874			Ets sites
-8318	-8308	1687	(-)	Drosophila homeodomain protein caudal, vertebrate homolog cdx		1035	1029 - 1041	(-)	fushi tarazu, involved in body segmentation of the drosophila embryo
-8298	-8284	1709	(+)	E74A early ecdysone-inducible gene in onset of Drosophila metamorphosis		1069	1064 - 1074	(-)	Zeste transvection gene product
-8172	-8152	1838	(+)	heat shock factor (Drosophila)		1073	1063 - 1083	(+)	Drosophila PAX6 P3 homeodomain binding site
-8127	-8115	1879	(-)	Crocodile regulator of head development, member of fork head domain protein family		1091	1084 - 1098	(-)	PHO (pleiohomeotic) and PHO-like, polycomp group proteins (PcG) binding to PREs (polycomb group response elements)
						1139	1132 - 1146	(+)	PHO (pleiohomeotic) and PHO-like, polycomp group proteins (PcG) binding to PREs (polycomb group response elements)
						1164	1158 - 1170	(+)	Crocodile regulator of head development, member of fork head domain protein family
						1238	1232 - 1244	(+)	Hunchback, early maternal and zygotic zinc finger gene, activated by bicoid
						1238	1233 - 1243	(-)	Drosophila homeodomain protein caudal, vertebrate homolog cdx
						1246	1240 - 1252	(-)	Deformed, homeotic gene in drosophila development
						1284	1274 - 1294	(-)	heat shock factor (Drosophila)
						1302	1298 - 1306	(-)	CF2-II, Zinc finger splice variant II
-8121	-8113	1883	(-)	CF2-II, Zinc finger splice variant II		1304	1300 - 1308	(-)	CF2-II, Zinc finger splice variant II
-8120	-8112	1884	(+)	CF2-II, Zinc finger splice variant II		1305	1301 - 1309	(+)	CF2-II, Zinc finger splice variant II
-8118	-8110	1886	(+)	CF2-II, Zinc finger splice variant II		1307	1303 - 1311	(+)	CF2-II, Zinc finger splice variant II
-8119	-8107	1887	(-)	Crocodile regulator of head development, member of fork head domain protein family		1308	1304 - 1312	(-)	CF2-II, Zinc finger splice variant II
-8100	-8084	1908	(+)	Broad-Complex Z4 Zinc Finger isoform
-8098	-8086	1908	(+)	Crocodile regulator of head development, member of fork head domain protein family
-8095	-8087	1909	(-)	CF2-II, Zinc finger splice variant II		1313	1309 - 1317	(+)	CF2-II, Zinc finger splice variant II
-8058	-8046	1948	(-)	fushi tarazu, involved in body segmentation of the drosophila embryo		1349	1343 - 1355	(-)	fushi tarazu, involved in body segmentation of the drosophila embryo
-8052	-8040	1954	(+)	fushi tarazu, involved in body segmentation of the drosophila embryo
-8051	-8039	1955	(-)	Deformed, homeotic gene in drosophila development		1394	1388 - 1400	(-)	Deformed, homeotic gene in drosophila development
						1455	1449 - 1461	(+)	Deformed, homeotic gene in drosophila development
						1459	1449 - 1469	(-)	Drosophila paired homeodomain
						1498	1494 - 1502	(-)	Drosophila gap gene tailless, involved in embryonic segmentation
						1516	1511 - 1521	(-)	Dorsal, protein for dorso-ventral axis formation, homologous to vertebrate c-rel
						1530	1524 - 1536	(+)	Crocodile regulator of head development, member of fork head domain protein family
						1533	1525 - 1541	(+)	Broad-Complex Z2 Zinc Finger isoform
						1568	1558 - 1578	(-)	Drosophila paired homeodomain
						1604			Ets sites
						1608	1601 - 1615	(+)	E74A early ecdysone-inducible gene in onset of Drosophila metamorphosis
						1647	1642 - 1652	(-)	Dorsal, protein for dorso-ventral axis formation, homologous to vertebrate c-rel
						1667	1660 - 1674	(+)	GAGA factor encoded by the Trithorax-like gene (Trl)
						1739	1729 - 1749	(-)	Drosophila paired homeodomain
						1821	1815 - 1827	(+)	Hunchback, early maternal and zygotic zinc finger gene, activated by bicoid
						1891	1887 - 1895	(+)	Drosophila gap gene tailless, involved in embryonic segmentation
						1897	1887 - 1907	(+)	heat shock factor (Drosophila)
						1900	1895 - 1905	(-)	Dorsal, protein for dorso-ventral axis formation, homologous to vertebrate c-rel
						1919	1909 - 1929	(-)	heat shock factor (Drosophila)
						1930	1920 - 1940	(+)	heat shock factor (Drosophila)
						1956	1950 - 1962	(-)	Drosophila Doublesex (DSX), involved in sex determination)
						2005	1999 - 2011	(-)	Crocodile regulator of head development, member of fork head domain protein family
						2009	2005 - 2013	(-)	CF2-II, Zinc finger splice variant II
						2042	2038 - 2046	(-)	Drosophila gap gene tailless, involved in embryonic segmentation
						2052	2047 - 2057	(-)	Drosophila homeodomain protein caudal, vertebrate homolog cdx
						2087	2082 - 2092	(+)	Dorsal, protein for dorso-ventral axis formation, homologous to vertebrate c-rel
						2091	2087 - 2095	(-)	Drosophila gap gene tailless, involved in embryonic segmentation
						2099	2089 - 2109	(+)	Drosophila PAX6 P3 homeodomain binding site
						2101	2091 - 2111	(-)	Drosophila PAX6 P3 homeodomain binding site
						2121	2116 - 2126	(-)	Drosophila homeodomain protein caudal, vertebrate homolog cdx
						2128	2122 - 2134	(+)	fushi tarazu, involved in body segmentation of the drosophila embryo
						2128	2124 - 2132	(+)	Drosophila gap gene tailless, involved in embryonic segmentation
						2134	2124 - 2144	(+)	heat shock factor (Drosophila)
						2172	2166 - 2178	(-)	Deformed, homeotic gene in drosophila development
						2226	2218 - 2234	(+)	Broad-Complex Z4 Zinc Finger isoform
						2229	2223 - 2235	(+)	Hunchback, early maternal and zygotic zinc finger gene, activated by bicoid
						2234	2230 - 2238	(+)	Drosophila gap gene tailless, involved in embryonic segmentation
						2262	2256 - 2268	(+)	Crocodile regulator of head development, member of fork head domain protein family
						2339	2329 - 2349	(+)	heat shock factor (Drosophila)
						2357	2347 - 2367	(+)	Drosophila PAX6 P3 homeodomain binding site
						2359	2349 - 2369	(-)	Drosophila PAX6 P3 homeodomain binding site
						2359	2355 - 2363	(+)	CF2-II, Zinc finger splice variant II
						2389	2383 - 2395	(+)	Crocodile regulator of head development, member of fork head domain protein family
						2396	2388 - 2404	(-)	Broad-Complex Z1 Zinc Finger isoform
						2397	2387 - 2407	(-)	PolyA signal of D-type LTRs
						2409	2404 - 2414	(-)	Dorsal, protein for dorso-ventral axis formation, homologous to vertebrate c-rel
						2493	2488 - 2498	(+)	Dorsal, protein for dorso-ventral axis formation, homologous to vertebrate c-rel
						2520	2516 - 2524	(-)	CF2-II, Zinc finger splice variant II
						2563	2558 - 2568	(+)	Zeste transvection gene product
						2590	2586 - 2594	(+)	Tramtrack 69K zinc finger protein, binding sites in eve gene
						2626	2626 - 2636	(-)	Hairy, transcriptional repressor
						2631	2626 - 2636	(-)	Hairy, transcriptional repressor
						2638	2633 - 2643	(-)	Zeste transvection gene product
						2642	2637 - 2647	(-)	Zeste transvection gene product
		2001				2659
		2033				2691
-7933	-7919	2074	(-)	PHO (pleiohomeotic) and PHO-like, polycomp group proteins (PcG) binding to PREs (polycomb group response elements)		2751	2741 - 2761	(+)	Avian C-type LTR PolyA signal
-7893	-7883	2112	(+)	drosophila T-cell factor, homolog of TCF/LEF, interacts with Armadillo (b-Catenin homolog		2765	2760 - 2770	(+)	drosophila T-cell factor, homolog of TCF/LEF, interacts with Armadillo (b-Catenin homolog
-7875	-7867	2129	(-)	Drosophila gap gene tailless, involved in embryonic segmentation		2777	2773 - 2781	(-)	Drosophila gap gene tailless, involved in embryonic segmentation
-7852	-7826	2148	(+)	duf 7.9 FEx		2782	2772 - 2792	(-)	Avian C-type LTR PolyA signal
		2189				2853
-7798	-7788	2207	(-)	drosophila T-cell factor, homolog of TCF/LEF, interacts with Armadillo (b-Catenin homolog		2872	2867 - 2877	(-)	drosophila T-cell factor, homolog of TCF/LEF, interacts with Armadillo (b-Catenin homolog
-7799	-7779	2211	(+)	heat shock factor (Drosophila)		2876	2866 - 2886	(+)	heat shock factor (Drosophila)
-7784	-7772	2222	(-)	Hunchback, early maternal and zygotic zinc finger gene, activated by bicoid		2887	2881 - 2893	(-)	Hunchback, early maternal and zygotic zinc finger gene, activated by bicoid
-7783	-7773	2222	(+)	Drosophila homeodomain protein caudal, vertebrate homolog cdx		2887	2882 - 2892	(+)	Drosophila homeodomain protein caudal, vertebrate homolog cdx
						2904	2894 - 2914	(+)	PolyA signal of D-type LTRs
		2242				2906
-7763	-7751	2243	(-)	Drosophila gap gene knirps, involved in embryonic segmentation		2931	2925 - 2937	(-)	Drosophila gap gene knirps, involved in embryonic segmentation
						2937	2927 - 2947	(+)	heat shock factor (Drosophila)
						2942	2932 - 2952	(+)	heat shock factor (Drosophila)
		2261				2947
-7738	-7726	2268	(+)	Crocodile regulator of head development, member of fork head domain protein family		2955	2949 - 2961	(+)	Crocodile regulator of head development, member of fork head domain protein family
-7734	-7722	2272	(+)	Crocodile regulator of head development, member of fork head domain protein family		2959	2953 - 2965	(+)	Crocodile regulator of head development, member of fork head domain protein family
-7725	-7705	2285	(+)	heat shock factor (Drosophila)
		2287				2973
-7703	-7693	2302	(-)	Dorsal, protein for dorso-ventral axis formation, homologous to vertebrate c-rel		3019	3013 - 3025	(-)	Crocodile regulator of head development, member of fork head domain protein family
-7702	-7682	2308	(+)	heat shock factor (Drosophila)
-7665	-7651	2342	(+)	E74A early ecdysone-inducible gene in onset of Drosophila metamorphosis		3107	3100 - 3114	(+)	E74A early ecdysone-inducible gene in onset of Drosophila metamorphosis
-7629	-7619	2376	(-)	drosophila T-cell factor, homolog of TCF/LEF, interacts with Armadillo (b-Catenin homolog		3124	3119 - 3129	(-)	drosophila T-cell factor, homolog of TCF/LEF, interacts with Armadillo (b-Catenin homolog
-7618	-7610	2386	(+)	Drosophila gap gene tailless, involved in embryonic segmentation		3133	3129 - 3137	(+)	Drosophila gap gene tailless, involved in embryonic segmentation
-7607	-7595	2399	(+)	Hunchback, early maternal and zygotic zinc finger gene, activated by bicoid		3140	3132 - 3148	(-)	Drosophila Elf-1 (NTF-1), vertebrate homolog CP2 (human, mouse)
-7606	-7596	2399	(-)	Drosophila homeodomain protein caudal, vertebrate homolog cdx		3155	3149 - 3161	(+)	fushi tarazu, involved in body segmentation of the drosophila embryo
-7589	-7575	2418	(+)	E74A early ecdysone-inducible gene in onset of Drosophila metamorphosis		3169	3163 - 3175	(+)	Hunchback, early maternal and zygotic zinc finger gene, activated by bicoid
-7584	-7574	2421	(-)	Dorsal, protein for dorso-ventral axis formation, homologous to vertebrate c-rel		3178	3172 - 3184	(+)	Deformed, homeotic gene in drosophila development
						3241	3235 - 3247	(-)	fushi tarazu, involved in body segmentation of the drosophila embryo
						3331	3321 - 3341	(+)	heat shock factor (Drosophila)
						3368	3364 - 3372	(-)	CF2-II, Zinc finger splice variant II
						3371	3367 - 3375	(+)	CF2-II, Zinc finger splice variant II
						3376	3369 - 3383	(-)	E74A early ecdysone-inducible gene in onset of Drosophila metamorphosis
						3395	3385 - 3405	(-)	Drosophila PAX6 P3 homeodomain binding site
-7469	-7457	2537	(-)	fushi tarazu, involved in body segmentation of the drosophila embryo		3418	3414 - 3422	(-)	CF2-II, Zinc finger splice variant II
-7382	-7362	2628	(-)	heat shock factor (Drosophila)		3431	3427 - 3435	(-)	CF2-II, Zinc finger splice variant II
-7342	-7326	2666	(-)	Drosophila Elf-1 (NTF-1), vertebrate homolog CP2 (human, mouse)		3432	3428 - 3436	(+)	CF2-II, Zinc finger splice variant II
-7258	-7248	2747	(-)	Krueppel, zinc finger protein, involved in body segmentation of the drosophila embryo		3434	3430 - 3438	(+)	CF2-II, Zinc finger splice variant II
-7247	-7235	2759	(+)	Suppressor of Hairless, linked to notch pathway		3435	3431 - 3439	(-)	CF2-II, Zinc finger splice variant II
-7205	-7193	2801	(+)	fushi tarazu, involved in body segmentation of the drosophila embryo		3473	3469 - 3477	(-)	CF2-II, Zinc finger splice variant II
-7159	-7135	2841	(+)	duf 7.2 FEx		3474	3470 - 3478	(+)	CF2-II, Zinc finger splice variant II
-7161	-7145	2847	(+)	Adf-1		3475	3471 - 3479	(-)	CF2-II, Zinc finger splice variant II
-7158	-7142	2850	(+)	Adf-1		3504	3500 - 3508	(+)	CF2-II, Zinc finger splice variant II
-7148	-7138	2857	(+)	Krueppel, zinc finger protein, involved in body segmentation of the drosophila embryo		3506	3502 - 3510	(+)	CF2-II, Zinc finger splice variant II
-7132	-7118	2875	(+)	signal transducers and activators of transcription		3509	3504 - 3514	(+)	Dorsal, protein for dorso-ventral axis formation, homologous to vertebrate c-rel
-7132	-7118	2875	(-)	signal transducers and activators of transcription		3529	3524 - 3534	(+)	drosophila T-cell factor, homolog of TCF/LEF, interacts with Armadillo (b-Catenin homolog
-7125	-7115	2880	(-)	Dorsal, protein for dorso-ventral axis formation, homologous to vertebrate c-rel		3559	3553 - 3565	(+)	Deformed, homeotic gene in drosophila development
-7124	-7104	2886	(+)	heat shock factor (Drosophila)		3560	3554 - 3566	(-)	Deformed, homeotic gene in drosophila development
-7115	-7105	2890	(-)	Dorsal, protein for dorso-ventral axis formation, homologous to vertebrate c-rel		3563	3557 - 3569	(+)	Deformed, homeotic gene in drosophila development
-7114	-7094	2896	(+)	heat shock factor (Drosophila)		3570	3564 - 3576	(+)	Deformed, homeotic gene in drosophila development
-7106	-7096	2899	(-)	Dorsal, protein for dorso-ventral axis formation, homologous to vertebrate c-rel		3610	3606 - 3614	(-)	Drosophila gap gene tailless, involved in embryonic segmentation
-7104	-7084	2906	(+)	heat shock factor (Drosophila)		3625	3619 - 3631	(+)	fushi tarazu, involved in body segmentation of the drosophila embryo
-7096	-7086	2909	(-)	Dorsal, protein for dorso-ventral axis formation, homologous to vertebrate c-rel		3634	3624 - 3644	(+)	heat shock factor (Drosophila)
-7076	-7066	2929	(+)	Krueppel, zinc finger protein, involved in body segmentation of the drosophila embryo		3639	3629 - 3649	(+)	Drosophila PAX6 P3 homeodomain binding site
						3646	3636 - 3656	(+)	Drosophila paired homeodomain
						3666	3656 - 3676	(+)	heat shock factor (Drosophila)
						3728	3722 - 3734	(+)	glial cells missing
						3783	3777 - 3789	(-)	Deformed, homeotic gene in drosophila development
						3807	3800 - 3814	(+)	signal transducers and activators of transcription
						3807	3800 - 3814	(-)	signal transducers and activators of transcription
						3886	3881 - 3891	(+)	Zeste transvection gene product
						3895	3888 - 3902	(+)	signal transducers and activators of transcription
						3895	3888 - 3902	(-)	signal transducers and activators of transcription
						3915	3911 - 3919	(-)	CF2-II, Zinc finger splice variant II
						3949	3943 - 3955	(+)	Drosophila gap gene knirps, involved in embryonic segmentation
						4036	4026 - 4046	(+)	Drosophila PAX6 P3 homeodomain binding site
						4038	4028 - 4048	(-)	Drosophila PAX6 P3 homeodomain binding site
						4056	4051 - 4061	(-)	Dorsal, protein for dorso-ventral axis formation, homologous to vertebrate c-rel
						4077	4071 - 4083	(+)	Suppressor of Hairless, linked to notch pathway
						4215	4209 - 4221	(+)	fushi tarazu, involved in body segmentation of the drosophila embryo
						4216	4210 - 4222	(+)	Crocodile regulator of head development, member of fork head domain protein family
						4278	4268 - 4288	(-)	Drosophila paired homeodomain
						4297	4287 - 4307	(+)	heat shock factor (Drosophila)
						4302	4292 - 4312	(+)	heat shock factor (Drosophila)
						4379	4375 - 4383	(-)	Drosophila gap gene tailless, involved in embryonic segmentation
						4381	4371 - 4391	(+)	heat shock factor (Drosophila)
						4410			Ets sites
						4430	4420 - 4440	(-)	Drosophila PAX6 P3 homeodomain binding site
						4441	4433 - 4449	(+)	Broad-Complex Z2 Zinc Finger isoform
						4485	4480 - 4490	(-)	Zeste transvection gene product
						4523	4513 - 4533	(+)	Drosophila paired homeodomain
						4652	4648 - 4656	(+)	Tramtrack 69K zinc finger protein, binding sites in eve gene
						4754			Ets sites
						4795	4790 - 4800	(-)	Hairy, transcriptional repressor
						4814	4808 - 4820	(-)	Drosophila gap gene knirps, involved in embryonic segmentation
						4820	4812 - 4828	(+)	Broad-Complex Z2 Zinc Finger isoform
						4827	4821 - 4833	(+)	Suppressor of Hairless, linked to notch pathway
						4831	4824 - 4838	(-)	Snail zinc finger protein, involved in dorso-ventral patterning
						4831	4825 - 4837	(-)	Drosophila gap gene knirps, involved in embryonic segmentation
						4837	4829 - 4845	(+)	Broad-Complex Z2 Zinc Finger isoform
						4855	4847 - 4863	(-)	Broad-Complex Z2 Zinc Finger isoform
						4944	4940 - 4948	(+)	CF2-II, Zinc finger splice variant II
						5004	5000 - 5008	(+)	Tramtrack 69K zinc finger protein, binding sites in eve gene
		2958				5080
-7041	-7031	2964	(-)	Zeste transvection gene product		5087	5082 - 5092	(-)	Zeste transvection gene product
		3001				5123
-6980	-6970	3025	(-)	Dorsal, protein for dorso-ventral axis formation, homologous to vertebrate c-rel		5165			E(Spl)
-6874	-6862	3132	(+)	Suppressor of Hairless, linked to notch pathway		5285	5279 - 5291	(+)	Hunchback, early maternal and zygotic zinc finger gene, activated by bicoid
-6754	-6744	3251	(+)	Dorsal, protein for dorso-ventral axis formation, homologous to vertebrate c-rel		5294	5287 - 5301	(+)	E74A early ecdysone-inducible gene in onset of Drosophila metamorphosis
-6742	-6726	3266	(+)	Broad-Complex Z4 Zinc Finger isoform		5304	5297 - 5311	(+)	E74A early ecdysone-inducible gene in onset of Drosophila metamorphosis
-6707	-6687	3303	(+)	Drosophila paired homeodomain		5308	5303 - 5313	(-)	Dorsal, protein for dorso-ventral axis formation, homologous to vertebrate c-rel
-6704	-6684	3306	(-)	Drosophila paired homeodomain		5325	5315 - 5335	(+)	Mammalian C-type LTR Poly A signal
-6587	-6567	3423	(+)	Drosophila paired homeodomain		5338	5331 - 5345	(+)	signal transducers and activators of transcription
-6555	-6543	3451	(+)	fushi tarazu, involved in body segmentation of the drosophila embryo		5338	5331 - 5345	(-)	signal transducers and activators of transcription
-6542	-6522	3468	(+)	heat shock factor (Drosophila)		5417	5407 - 5427	(+)	Drosophila PAX6 P3 homeodomain binding site
-6517	-6507	3488	(-)	Zeste transvection gene product		5419	5409 - 5429	(-)	Drosophila PAX6 P3 homeodomain binding site
-6515	-6495	3495	(-)	Drosophila paired homeodomain		5460	5455 - 5465	(+)	Hairy, transcriptional repressor
-6439	-6414	3561	(+)	duf 6.5 FEx		5570	5563 - 5577	(-)	GAGA factor encoded by the Trithorax-like gene (Trl)
-6449	-6429	3561	(-)	heat shock factor (Drosophila)		5590	5584 - 5596	(+)	fushi tarazu, involved in body segmentation of the drosophila embryo
-6322	-6295	3678	(+)	duf 6.4 FEx		5602	5597 - 5607	(+)	Krueppel, zinc finger protein, involved in body segmentation of the drosophila embryo
						5622	5616 - 5628	(+)	glial cells missing
						5631	5621 - 5641	(-)	heat shock factor (Drosophila)
						5642	5632 - 5652	(+)	heat shock factor (Drosophila)
						5644	5639 - 5649	(+)	Zeste transvection gene product
						5693	5689 - 5697	(+)	CF2-II, Zinc finger splice variant II
						5694	5690 - 5698	(-)	CF2-II, Zinc finger splice variant II
						5699	5695 - 5703	(+)	CF2-II, Zinc finger splice variant II
						5725	5715 - 5735	(+)	Drosophila PAX6 P3 homeodomain binding site
						5743	5737 - 5749	(-)	Drosophila Doublesex (DSX), involved in sex determination)
						5758	5751 - 5765	(+)	E74A early ecdysone-inducible gene in onset of Drosophila metamorphosis
						5762	5757 - 5767	(-)	Dorsal, protein for dorso-ventral axis formation, homologous to vertebrate c-rel
						5822			Brk repressor
						5875	5871 - 5879	(+)	CF2-II, Zinc finger splice variant II
						5876	5870 - 5882	(-)	Crocodile regulator of head development, member of fork head domain protein family
						5876	5872 - 5880	(-)	CF2-II, Zinc finger splice variant II
						5878			Ets sites
						5881	5871 - 5891	(-)	heat shock factor (Drosophila)
						5892	5882 - 5902	(+)	heat shock factor (Drosophila)
						5894			Ets sites
						5923	5918 - 5928	(-)	Zeste transvection gene product
		3830				5944
		3857				5971
-6134	-6122	3872	(-)	glial cells missing		5981			Mad site
-6127	-6117	3878	(+)	Hairy, transcriptional repressor		5985	5977 - 5993	(+)	Adf-1
						6013			Ets sites
						6020			Ets sites
						6027			Ets sites
						6056	6050 - 6062	(-)	glial cells missing
						6081	6073 - 6089	(-)	Drosophila Elf-1 (NTF-1), vertebrate homolog CP2 (human, mouse)
		3920				6088
-6066	-6056	3939	(-)	Dorsal, protein for dorso-ventral axis formation, homologous to vertebrate c-rel		6108	6103 - 6113	(-)	Dorsal, protein for dorso-ventral axis formation, homologous to vertebrate c-rel
-6064	-6044	3946	(+)	heat shock factor (Drosophila)		6115	6105 - 6125	(+)	heat shock factor (Drosophila)
-6051	-6041	3954	(+)	drosophila T-cell factor, homolog of TCF/LEF, interacts with Armadillo (b-Catenin homolog		6123	6118 - 6128	(+)	drosophila T-cell factor, homolog of TCF/LEF, interacts with Armadillo (b-Catenin homolog
		3966				6134
						6146	6142 - 6150	(+)	Drosophila gap gene tailless, involved in embryonic segmentation
						6157	6151 - 6163	(-)	Drosophila gap gene knirps, involved in embryonic segmentation
-6010	-6000	3995	(-)	Dorsal, protein for dorso-ventral axis formation, homologous to vertebrate c-rel		6190	6185 - 6195	(-)	Dorsal, protein for dorso-ventral axis formation, homologous to vertebrate c-rel
		4011				6190
-5989	-5977	4017	(-)	Drosophila gap gene knirps, involved in embryonic segmentation		6197	6191 - 6203	(-)	Drosophila gap gene knirps, involved in embryonic segmentation
-5988	-5974	4019	(+)	E74A early ecdysone-inducible gene in onset of Drosophila metamorphosis		6199	6192 - 6206	(+)	E74A early ecdysone-inducible gene in onset of Drosophila metamorphosis
		4044				6223
-5921	-5901	4089	(+)	Drosophila paired homeodomain		6292	6285 - 6299	(+)	Snail zinc finger protein, involved in dorso-ventral patterning
-5895	-5887	4109	(+)	CF2-II, Zinc finger splice variant II		6353	6346 - 6360	(-)	GAGA factor encoded by the Trithorax-like gene (Trl)
		4254				6387
-5746	-5734	4260	(+)	Drosophila gap gene knirps, involved in embryonic segmentation		6391	6385 - 6397	(+)	Drosophila gap gene knirps, involved in embryonic segmentation
		4267		Brk repressor		6401			Brk repressor
-5711	-5697	4296	(+)	Snail zinc finger protein, involved in dorso-ventral patterning		6422	6415 - 6429	(-)	Snail zinc finger protein, involved in dorso-ventral patterning
-5697	-5677	4313	(-)	heat shock factor (Drosophila)
		4316				6449
-5689	-5677	4317	(-)	glial cells missing		6530	6526 - 6534	(+)	CF2-II, Zinc finger splice variant II
-5668	-5656	4338	(+)	Drosophila gap gene knirps, involved in embryonic segmentation		6531	6527 - 6535	(-)	CF2-II, Zinc finger splice variant II
						6534	6530 - 6538	(+)	CF2-II, Zinc finger splice variant II
						6535	6529 - 6541	(-)	Crocodile regulator of head development, member of fork head domain protein family
-5581	-5571	4424	(-)	Zeste transvection gene product		6595	6591 - 6599	(-)	Drosophila gap gene tailless, involved in embryonic segmentation
		4434				6600
-5558	-5546	4448	(+)	Suppressor of Hairless, linked to notch pathway		6615	6609 - 6621	(+)	Suppressor of Hairless, linked to notch pathway
-5556	-5536	4454	(-)	heat shock factor (Drosophila)		6626	6619 - 6633	(-)	E74A early ecdysone-inducible gene in onset of Drosophila metamorphosis
-5519	-5509	4486	(+)	Dorsal, protein for dorso-ventral axis formation, homologous to vertebrate c-rel		6653	6648 - 6658	(+)	Dorsal, protein for dorso-ventral axis formation, homologous to vertebrate c-rel
		4494				6660
-5454	-5446	4550	(-)	Tramtrack 69K zinc finger protein, binding sites in eve gene		6743			Mad site
		4558				6799
-5442	-5430	4564	(-)	fushi tarazu, involved in body segmentation of the drosophila embryo		6806	6800 - 6812	(-)	fushi tarazu, involved in body segmentation of the drosophila embryo
-5432	-5412	4578	(-)	heat shock factor (Drosophila)		6820	6810 - 6830	(-)	heat shock factor (Drosophila)
-5427	-5415	4579	(-)	fushi tarazu, involved in body segmentation of the drosophila embryo		6821	6815 - 6827	(-)	fushi tarazu, involved in body segmentation of the drosophila embryo
-5425	-5417	4579	(-)	Drosophila gap gene tailless, involved in embryonic segmentation		6821	6817 - 6825	(-)	Drosophila gap gene tailless, involved in embryonic segmentation
-5427	-5407	4583	(-)	heat shock factor (Drosophila)		6825	6815 - 6835	(-)	heat shock factor (Drosophila)
-5414	-5390	4586	(+)	Duf 5.5 FEx
		4615				6856
-5380	-5368	4626	(+)	Hunchback, early maternal and zygotic zinc finger gene, activated by bicoid		6881	6875 - 6887	(+)	fushi tarazu, involved in body segmentation of the drosophila embryo
-5363	-5355	4641	(+)	Drosophila gap gene tailless, involved in embryonic segmentation		6963	6953 - 6973	(-)	Drosophila paired homeodomain
						6963	6957 - 6969	(+)	fushi tarazu, involved in body segmentation of the drosophila embryo
						6998	6988 - 7008	(-)	heat shock factor (Drosophila)
						7027			Ets sites
						7077	7067 - 7087	(-)	Drosophila paired homeodomain
						7163	7153 - 7173	(+)	Drosophila paired homeodomain
						7206	7202 - 7210	(-)	CF2-II, Zinc finger splice variant II
						7253	7247 - 7259	(-)	fushi tarazu, involved in body segmentation of the drosophila embryo
-5353	-5337	4655	(+)	Broad-Complex Z4 Zinc Finger isoform		7260	7250 - 7270	(-)	Drosophila PAX6 P3 homeodomain binding site
		4665		Brk repressor		7300			Brk repressor
						7316	7310 - 7322	(-)	Hunchback, early maternal and zygotic zinc finger gene, activated by bicoid
						7351	7341 - 7361	(-)	heat shock factor (Drosophila)
						7439	7435 - 7443	(-)	Drosophila gap gene tailless, involved in embryonic segmentation
						7440	7434 - 7446	(-)	fushi tarazu, involved in body segmentation of the drosophila embryo
						7563	7558 - 7568	(-)	Dorsal, protein for dorso-ventral axis formation, homologous to vertebrate c-rel
						7575	7569 - 7581	(-)	fushi tarazu, involved in body segmentation of the drosophila embryo
						7576	7566 - 7586	(+)	Drosophila PAX6 P3 homeodomain binding site
						7613	7605 - 7621	(+)	Broad-Complex Z2 Zinc Finger isoform
						7613	7607 - 7619	(+)	Hunchback, early maternal and zygotic zinc finger gene, activated by bicoid
						7613	7608 - 7618	(-)	Drosophila homeodomain protein caudal, vertebrate homolog cdx
						7626	7616 - 7636	(-)	heat shock factor (Drosophila)
-5285	-5275	4720	(+)	drosophila T-cell factor, homolog of TCF/LEF, interacts with Armadillo (b-Catenin homolog		7715	7710 - 7720	(+)	Drosophila homeodomain protein caudal, vertebrate homolog cdx
-5250	-5240	4755	(+)	Drosophila homeodomain protein caudal, vertebrate homolog cdx		7733	7723 - 7743	(-)	Drosophila PAX6 P3 homeodomain binding site
-5247	-5233	4760	(-)	Snail zinc finger protein, involved in dorso-ventral patterning		7820	7810 - 7830	(-)	heat shock factor (Drosophila)
-5236	-5211	4764	(+)	Duf 5.35 FEx		7828	7822 - 7834	(+)	Suppressor of Hairless, linked to notch pathway
-5221	-5207	4786	(+)	signal transducers and activators of transcription		7835	7827 - 7843	(+)	Broad-Complex Z2 Zinc Finger isoform
-5221	-5207	4786	(-)	signal transducers and activators of transcription		7865			Brk repressor
-5213	-5193	4797	(+)	heat shock factor (Drosophila)		7868	7863 - 7873	(+)	Dorsal, protein for dorso-ventral axis formation, homologous to vertebrate c-rel
-5188	-5172	4820	(+)	Broad-Complex Z2 Zinc Finger isoform		7908	7904 - 7912	(-)	CF2-II, Zinc finger splice variant II
-5186	-5166	4824	(+)	heat shock factor (Drosophila)		7982	7976 - 7988	(+)	Crocodile regulator of head development, member of fork head domain protein family
-5162	-5150	4844	(+)	Deformed, homeotic gene in drosophila development		7996	7991 - 8001	(+)	Dorsal, protein for dorso-ventral axis formation, homologous to vertebrate c-rel
-5132	-5112	4878	(+)	Drosophila paired homeodomain		8091	8081 - 8101	(-)	Drosophila paired homeodomain
-5101	-5091	4904	(+)	Dorsal, protein for dorso-ventral axis formation, homologous to vertebrate c-rel		8126	8121 - 8131	(-)	Drosophila homeodomain protein caudal, vertebrate homolog cdx
						8148	8144 - 8152	(-)	CF2-II, Zinc finger splice variant II
						8294	8287 - 8301	(-)	GAGA factor encoded by the Trithorax-like gene (Trl)
						8344	8338 - 8350	(+)	Drosophila gap gene knirps, involved in embryonic segmentation
-5092	-5082	4913	(+)	Dorsal, protein for dorso-ventral axis formation, homologous to vertebrate c-rel		8354	8348 - 8360	(-)	Crocodile regulator of head development, member of fork head domain protein family
		4941				8354
		4988		Ets sites		8402			Ets sites
-5009	-4995	4998	(+)	E74A early ecdysone-inducible gene in onset of Drosophila metamorphosis		8412	8405 - 8419	(+)	E74A early ecdysone-inducible gene in onset of Drosophila metamorphosis
		5012				8425
-4967	-4946	5033	(+)	Duf 5.1 FEx		8490	8480 - 8500	(-)	heat shock factor (Drosophila)
-4946	-4934	5060	(-)	Suppressor of Hairless, linked to notch pathway		8500	8494 - 8506	(-)	Suppressor of Hairless, linked to notch pathway
		5071		Tinman		8504	8499 - 8509	(-)	Zeste transvection gene product
-4923	-4913	5082	(-)	Drosophila homeodomain protein caudal, vertebrate homolog cdx		8546	8540 - 8552	(+)	Hunchback, early maternal and zygotic zinc finger gene, activated by bicoid
-4898	-4882	5110	(+)	Broad-Complex Z2 Zinc Finger isoform		8603	8595 - 8611	(+)	Broad-Complex Z2 Zinc Finger isoform
-4834	-4826	5170	(-)	CF2-II, Zinc finger splice variant II		8660	8652 - 8668	(+)	Broad-Complex Z4 Zinc Finger isoform
-4830	-4820	5175	(-)	drosophila T-cell factor, homolog of TCF/LEF, interacts with Armadillo (b-Catenin homolog		8678	8674 - 8682	(+)	CF2-II, Zinc finger splice variant II
-4791	-4779	5215	(-)	Drosophila gap gene knirps, involved in embryonic segmentation		8680	8676 - 8684	(+)	CF2-II, Zinc finger splice variant II
-4737	-4721	5271	(+)	Broad-Complex Z1 Zinc Finger isoform		8681	8677 - 8685	(-)	CF2-II, Zinc finger splice variant II
-4713	-4697	5295	(+)	Broad-Complex Z1 Zinc Finger isoform		8696	8686 - 8706	(+)	Drosophila paired homeodomain
-4708	-4696	5298	(+)	Hunchback, early maternal and zygotic zinc finger gene, activated by bicoid		8698	8690 - 8706	(+)	Broad-Complex Z2 Zinc Finger isoform
-4655	-4645	5350	(+)	Hairy, transcriptional repressor		8735	8730 - 8740	(+)	Krueppel, zinc finger protein, involved in body segmentation of the drosophila embryo
-4614	-4602	5392	(+)	Hunchback, early maternal and zygotic zinc finger gene, activated by bicoid		8745	8739 - 8751	(-)	Drosophila gap gene knirps, involved in embryonic segmentation
-4597	-4581	5411	(-)	Broad-Complex Z4 Zinc Finger isoform		8764	8754 - 8774	(-)	heat shock factor (Drosophila)
-4595	-4583	5411	(-)	Crocodile regulator of head development, member of fork head domain protein family		8860	8850 - 8870	(+)	Drosophila paired homeodomain
-4576	-4556	5434	(+)	heat shock factor (Drosophila)		8871	8866 - 8876	(+)	Zeste transvection gene product
-4569	-4561	5435	(+)	Drosophila gap gene tailless, involved in embryonic segmentation		8878	8873 - 8883	(+)	Zeste transvection gene product
-4567	-4547	5443	(-)	heat shock factor (Drosophila)
-4477	-4450	5523	(+)	Duf 4.6 FEx
-4466	-4454	5540	(-)	fushi tarazu, involved in body segmentation of the drosophila embryo
-4469	-4449	5541	(+)	Drosophila PAX6 P3 homeodomain binding site		8902	8892 - 8912	(+)	Drosophila PAX6 P3 homeodomain binding site
-4467	-4447	5543	(-)	Drosophila PAX6 P3 homeodomain binding site		8904	8894 - 8914	(-)	Drosophila PAX6 P3 homeodomain binding site
-4458	-4438	5552	(+)	Drosophila paired homeodomain		8912	8907 - 8917	(-)	Zeste transvection gene product
-4455	-4435	5555	(-)	Drosophila paired homeodomain		8953	8946 - 8960	(+)	E74A early ecdysone-inducible gene in onset of Drosophila metamorphosis
-4441	-4427	5566	(+)	signal transducers and activators of transcription		8997	8991 - 9003	(-)	Deformed, homeotic gene in drosophila development
-4423	-4415	5581	(-)	Drosophila gap gene tailless, involved in embryonic segmentation		9016	9010 - 9022	(+)	Drosophila Doublesex (DSX), involved in sex determination)
-4421	-4409	5585	(-)	Hunchback, early maternal and zygotic zinc finger gene, activated by bicoid		9025	9019 - 9031	(-)	Deformed, homeotic gene in drosophila development
-4388	-4380	5616	(-)	chorion factor 1, homologous to retinoid X receptor		9028	9022 - 9034	(+)	Deformed, homeotic gene in drosophila development
-4379	-4369	5626	(-)	Drosophila homeodomain protein caudal, vertebrate homolog cdx		9029	9023 - 9035	(-)	Deformed, homeotic gene in drosophila development
-4354	-4346	5650	(-)	CF2-II, Zinc finger splice variant II		9046	9036 - 9056	(-)	Drosophila paired homeodomain
-4351	-4343	5653	(+)	CF2-II, Zinc finger splice variant II		9050	9044 - 9056	(+)	Deformed, homeotic gene in drosophila development
-4316	-4296	5694	(+)	Drosophila paired homeodomain		9064	9058 - 9070	(+)	Deformed, homeotic gene in drosophila development
-4212	-4192	5798	(+)	Drosophila PAX6 P3 homeodomain binding site
-4204	-4192	5802	(-)	Deformed, homeotic gene in drosophila development
-4166	-4150	5842	(+)	Broad-Complex Z2 Zinc Finger isoform
-4164	-4144	5846	(+)	Drosophila paired homeodomain
-4157	-4145	5849	(+)	fushi tarazu, involved in body segmentation of the drosophila embryo
-3985	-3973	6021	(-)	Drosophila gap gene knirps, involved in embryonic segmentation
-3965	-3953	6041	(+)	Drosophila Doublesex (DSX), involved in sex determination)
-3856	-3844	6150	(+)	Hunchback, early maternal and zygotic zinc finger gene, activated by bicoid
-3849	-3841	6155	(+)	Drosophila gap gene tailless, involved in embryonic segmentation
-3843	-3835	6161	(+)	Drosophila gap gene tailless, involved in embryonic segmentation
-3819	-3809	6186	(+)	Dorsal, protein for dorso-ventral axis formation, homologous to vertebrate c-rel		9069	9065 - 9073	(+)	CF2-II, Zinc finger splice variant II
-3818	-3804	6189	(-)	E74A early ecdysone-inducible gene in onset of Drosophila metamorphosis		9070	9066 - 9074	(-)	CF2-II, Zinc finger splice variant II
-3807	-3787	6203	(+)	Drosophila PAX6 P3 homeodomain binding site		9087	9077 - 9097	(+)	Drosophila PAX6 P3 homeodomain binding site
-3805	-3785	6205	(-)	Drosophila PAX6 P3 homeodomain binding site		9140	9134 - 9146	(-)	Deformed, homeotic gene in drosophila development
-3783	-3769	6224	(-)	GAGA factor encoded by the Trithorax-like gene (Trl)		9281	9275 - 9287	(+)	Drosophila Doublesex (DSX), involved in sex determination)
-3777	-3763	6230	(-)	GAGA factor encoded by the Trithorax-like gene (Trl)		9386	9380 - 9392	(-)	Drosophila gap gene knirps, involved in embryonic segmentation
-3775	-3761	6232	(-)	GAGA factor encoded by the Trithorax-like gene (Trl)		9453	9443 - 9463	(+)	Drosophila PAX6 P3 homeodomain binding site
-3773	-3759	6234	(-)	GAGA factor encoded by the Trithorax-like gene (Trl)		9509			E(Spl)
-3771	-3757	6236	(-)	GAGA factor encoded by the Trithorax-like gene (Trl)		9575	9568 - 9582	(-)	GAGA factor encoded by the Trithorax-like gene (Trl)
-3668	-3645	6332	(+)	Duf 3.8 FEx		9602	9597 - 9607	(-)	Hairy, transcriptional repressor
		6353		Ets sites		9668			Ets sites
-3668	-3645	6355	(-)	Duf 3.8 RBx		9716	9711 - 9721	(-)	Dorsal, protein for dorso-ventral axis formation, homologous to vertebrate c-rel
-3664	-3639	6361	(-)	Duf 3.8 REx		9722	9716 - 9728	(+)	Drosophila Doublesex (DSX), involved in sex determination)
-3643	-3623	6367	(+)	heat shock factor (Drosophila)		9786	9781 - 9791	(+)	drosophila T-cell factor, homolog of TCF/LEF, interacts with Armadillo (b-Catenin homolog
-3585	-3569	6423	(+)	Broad-Complex Z1 Zinc Finger isoform		9791	9781 - 9801	(+)	Drosophila paired homeodomain
-3566	-3554	6440	(-)	fushi tarazu, involved in body segmentation of the drosophila embryo		9818	9808 - 9828	(+)	heat shock factor (Drosophila)
-3550	-3534	6458	(+)	Drosophila Elf-1 (NTF-1), vertebrate homolog CP2 (human, mouse)		9822	9816 - 9828	(-)	Drosophila gap gene knirps, involved in embryonic segmentation
-3543	-3533	6462	(+)	Drosophila homeodomain protein caudal, vertebrate homolog cdx		9909	9903 - 9915	(-)	Deformed, homeotic gene in drosophila development
-3519	-3503	6489	(-)	Broad-Complex Z4 Zinc Finger isoform
-3515	-3505	6490	(+)	Drosophila homeodomain protein caudal, vertebrate homolog cdx
-3511	-3503	6493	(-)	CF2-II, Zinc finger splice variant II
-3502	-3482	6508	(-)	Drosophila paired homeodomain
-3478	-3470	6526	(+)	CF2-II, Zinc finger splice variant II		9959	9949 - 9969	(-)	heat shock factor (Drosophila)
		6561				9971
		6593				10003
-3400	-3386	6607	(-)	GAGA factor encoded by the Trithorax-like gene (Trl)
-3398	-3384	6609	(-)	GAGA factor encoded by the Trithorax-like gene (Trl)
-3396	-3382	6611	(-)	GAGA factor encoded by the Trithorax-like gene (Trl)
-3384	-3370	6623	(-)	GAGA factor encoded by the Trithorax-like gene (Trl)
-3362	-3348	6645	(-)	GAGA factor encoded by the Trithorax-like gene (Trl)
		6680		Ets sites		10056			Ets sites
-3316	-3304	6690	(+)	Deformed, homeotic gene in drosophila development		10062	10056 - 10068	(+)	Deformed, homeotic gene in drosophila development
		6726		Brk repressor
		6739				10088
						10097	10090 - 10104	(+)	E74A early ecdysone-inducible gene in onset of Drosophila metamorphosis
-3246	-3234	6760	(+)	Hunchback, early maternal and zygotic zinc finger gene, activated by bicoid		10110	10104 - 10116	(+)	Hunchback, early maternal and zygotic zinc finger gene, activated by bicoid
		6780				10129
-3149	-3139	6856	(-)	Hairy, transcriptional repressor		10133	10129 - 10137	(-)	Drosophila gap gene tailless, involved in embryonic segmentation
-3100	-3086	6907	(-)	GAGA factor encoded by the Trithorax-like gene (Trl)
		6964				10261
-3042	-3022	6968	(-)	heat shock factor (Drosophila)		10270	10260 - 10280	(-)	heat shock factor (Drosophila)
-3015	-3003	6991	(-)	fushi tarazu, involved in body segmentation of the drosophila embryo		10289	10283 - 10295	(-)	fushi tarazu, involved in body segmentation of the drosophila embryo
						10319	10313 - 10325	(-)	fushi tarazu, involved in body segmentation of the drosophila embryo
		7033				10330
-2946	-2936	7059	(-)	Dorsal, protein for dorso-ventral axis formation, homologous to vertebrate c-rel
-2939	-2919	7071	(-)	Drosophila paired homeodomain
-2918	-2908	7087	(+)	Dorsal, protein for dorso-ventral axis formation, homologous to vertebrate c-rel
-2920	-2900	7090	(-)	heat shock factor (Drosophila)
-2913	-2905	7091	(-)	Drosophila gap gene tailless, involved in embryonic segmentation
-2907	-2895	7099	(-)	fushi tarazu, involved in body segmentation of the drosophila embryo
-2839	-2815	7161	(+)	Duf 3.0 FEx
-2798	-2838	7202	(-)	duf 3.0 RBx
-2796	-2838	7204	(-)	duf 3.0 REX
-2771	-2761	7234	(-)	Zeste transvection gene product
-2765	-2745	7245	(-)	heat shock factor (Drosophila)		10377	10367 - 10387	(-)	heat shock factor (Drosophila)
-2757	-2743	7250	(-)	E74A early ecdysone-inducible gene in onset of Drosophila metamorphosis
-2750	-2736	7257	(-)	E74A early ecdysone-inducible gene in onset of Drosophila metamorphosis
		7260		Ets sites		10397			Ets sites
		7276				10426
-2708	-2688	7302	(+)	Drosophila paired homeodomain		10453	10443 - 10463	(+)	Drosophila paired homeodomain
-2698	-2690	7306	(-)	Drosophila gap gene tailless, involved in embryonic segmentation		10457	10453 - 10461	(-)	Drosophila gap gene tailless, involved in embryonic segmentation
		7324				10474
		7331		Mad site		10520			Mad site
		7403				10530
						10545	10537 - 10553	(-)	Broad-Complex Z1 Zinc Finger isoform
						10554	10546 - 10562	(-)	Drosophila Elf-1 (NTF-1), vertebrate homolog CP2 (human, mouse)
-2570	-2562	7434	(+)	Drosophila gap gene tailless, involved in embryonic segmentation		10562	10558 - 10566	(+)	Drosophila gap gene tailless, involved in embryonic segmentation
		7440				10567
-2555	-2545	7450	(-)	Dorsal, protein for dorso-ventral axis formation, homologous to vertebrate c-rel		10577	10571 - 10583	(+)	Hunchback, early maternal and zygotic zinc finger gene, activated by bicoid
						10616	10610 - 10622	(-)	Hunchback, early maternal and zygotic zinc finger gene, activated by bicoid
						10652	10646 - 10658	(-)	Deformed, homeotic gene in drosophila development
						10663			E(Spl)
						10664	10658 - 10670	(-)	Drosophila gap gene knirps, involved in embryonic segmentation
						10669	10665 - 10673	(+)	Drosophila gap gene tailless, involved in embryonic segmentation
						10685	10675 - 10695	(+)	heat shock factor (Drosophila)
						10720			Ets sites
						10724	10717 - 10731	(+)	E74A early ecdysone-inducible gene in onset of Drosophila metamorphosis
						10739	10732 - 10746	(+)	signal transducers and activators of transcription
						10739	10732 - 10746	(-)	signal transducers and activators of transcription
						10766	10760 - 10772	(-)	fushi tarazu, involved in body segmentation of the drosophila embryo
						10870	10866 - 10874	(+)	Drosophila gap gene tailless, involved in embryonic segmentation
						10878	10868 - 10888	(-)	Drosophila paired homeodomain
						10920	10913 - 10927	(-)	E74A early ecdysone-inducible gene in onset of Drosophila metamorphosis
						10928	10920 - 10936	(+)	Drosophila Elf-1 (NTF-1), vertebrate homolog CP2 (human, mouse)
-2553	-2541	7453	(+)	Hunchback, early maternal and zygotic zinc finger gene, activated by bicoid		10932	10926 - 10938	(-)	Hunchback, early maternal and zygotic zinc finger gene, activated by bicoid
-2491	-2471	7519	(-)	heat shock factor (Drosophila)
-2486	-2466	7524	(-)	heat shock factor (Drosophila)		10941	10935 - 10947	(+)	Drosophila gap gene knirps, involved in embryonic segmentation
		7577				10947
		7597				10967
-2401	-2391	7604	(-)	Drosophila homeodomain protein caudal, vertebrate homolog cdx		10998	10992 - 11004	(-)	Hunchback, early maternal and zygotic zinc finger gene, activated by bicoid
-2392	-2380	7614	(-)	Suppressor of Hairless, linked to notch pathway		11033	11027 - 11039	(-)	Suppressor of Hairless, linked to notch pathway
-2359	-2347	7647	(-)	Drosophila gap gene knirps, involved in embryonic segmentation		11049	11042 - 11056	(+)	GAGA factor encoded by the Trithorax-like gene (Trl)
-2312	-2300	7694	(-)	fushi tarazu, involved in body segmentation of the drosophila embryo		11051	11044 - 11058	(+)	GAGA factor encoded by the Trithorax-like gene (Trl)
-2287	-2275	7719	(-)	Drosophila gap gene knirps, involved in embryonic segmentation		11059	11052 - 11066	(+)	GAGA factor encoded by the Trithorax-like gene (Trl)
-2264	-2254	7741	(-)	Zeste transvection gene product		11061	11054 - 11068	(+)	GAGA factor encoded by the Trithorax-like gene (Trl)
-2254	-2230	7746	(+)	Duf 2.4 FEx		11063	11056 - 11070	(+)	GAGA factor encoded by the Trithorax-like gene (Trl)
		7777		Ets sites
-2209	-2201	7795	(+)	Drosophila gap gene tailless, involved in embryonic segmentation
-2201	-2193	7803	(+)	Drosophila gap gene tailless, involved in embryonic segmentation
-2170	-2154	7838	(+)	Drosophila Elf-1 (NTF-1), vertebrate homolog CP2 (human, mouse)
-2165	-2145	7845	(-)	heat shock factor (Drosophila)		11103	11096 - 11110	(+)	PHO (pleiohomeotic) and PHO-like, polycomp group proteins (PcG) binding to PREs (polycomb group response elements)
-2106	-2096	7899	(+)	drosophila T-cell factor, homolog of TCF/LEF, interacts with Armadillo (b-Catenin homolog		11231	11226 - 11236	(+)	drosophila T-cell factor, homolog of TCF/LEF, interacts with Armadillo (b-Catenin homolog
-2100	-2086	7907	(-)	Snail zinc finger protein, involved in dorso-ventral patterning		11311	11301 - 11321	(-)	heat shock factor (Drosophila)
-2060	-2050	7945	(-)	Zeste transvection gene product
-2057	-2045	7949	(+)	Drosophila gap gene knirps, involved in embryonic segmentation
		7954				11349
-2019	-2009	7986	(-)	Krueppel, zinc finger protein, involved in body segmentation of the drosophila embryo
		8002				11397
-1997	-1987	8008	(-)	Dorsal, protein for dorso-ventral axis formation, homologous to vertebrate c-rel
-1925	-1915	8080	(-)	Dorsal, protein for dorso-ventral axis formation, homologous to vertebrate c-rel
		8087				11495
		8111				11519
-1888	-1876	8118	(+)	Suppressor of Hairless, linked to notch pathway		11558	11552 - 11564	(+)	Suppressor of Hairless, linked to notch pathway
-1835	-1825	8170	(-)	Drosophila homeodomain protein caudal, vertebrate homolog cdx		11601	11594 - 11608	(-)	PHO (pleiohomeotic) and PHO-like, polycomp group proteins (PcG) binding to PREs (polycomb group response elements)
-1817	-1809	8187	(+)	Drosophila gap gene tailless, involved in embryonic segmentation		11640	11634 - 11646	(+)	Drosophila Doublesex (DSX), involved in sex determination)
-1803	-1795	8201	(-)	CF2-II, Zinc finger splice variant II		11666	11661 - 11671	(-)	Dorsal, protein for dorso-ventral axis formation, homologous to vertebrate c-rel
-1800	-1792	8204	(+)	CF2-II, Zinc finger splice variant II		11677	11667 - 11687	(-)	heat shock factor (Drosophila)
-1794	-1782	8212	(-)	Hunchback, early maternal and zygotic zinc finger gene, activated by bicoid		11688	11678 - 11698	(+)	heat shock factor (Drosophila)
-1766	-1750	8242	(-)	Broad-Complex Z1 Zinc Finger isoform		11693	11689 - 11697	(+)	Drosophila gap gene tailless, involved in embryonic segmentation
-1718	-1710	8286	(+)	CF2-II, Zinc finger splice variant II		11697	11687 - 11707	(-)	Drosophila paired homeodomain
-1716	-1708	8288	(+)	CF2-II, Zinc finger splice variant II		11785			Ets sites
-1715	-1707	8289	(-)	CF2-II, Zinc finger splice variant II		11816	11812 - 11820	(+)	Drosophila gap gene tailless, involved in embryonic segmentation
-1684	-1672	8322	(+)	fushi tarazu, involved in body segmentation of the drosophila embryo		11858	11852 - 11864	(+)	Drosophila gap gene knirps, involved in embryonic segmentation
-1681	-1673	8323	(+)	Drosophila gap gene tailless, involved in embryonic segmentation		11911	11901 - 11921	(-)	heat shock factor (Drosophila)
-1684	-1664	8326	(-)	Drosophila PAX6 P3 homeodomain binding site		11915	11910 - 11920	(+)	drosophila T-cell factor, homolog of TCF/LEF, interacts with Armadillo (b-Catenin homolog
-1678	-1666	8328	(-)	Deformed, homeotic gene in drosophila development		11941	11935 - 11947	(+)	Suppressor of Hairless, linked to notch pathway
-1675	-1663	8331	(+)	Deformed, homeotic gene in drosophila development		11945	11939 - 11951	(-)	Drosophila gap gene knirps, involved in embryonic segmentation
-1674	-1662	8332	(-)	fushi tarazu, involved in body segmentation of the drosophila embryo		12077	12070 - 12084	(-)	GAGA factor encoded by the Trithorax-like gene (Trl)
-1677	-1657	8333	(+)	Drosophila PAX6 P3 homeodomain binding site		12191	12181 - 12201	(+)	heat shock factor (Drosophila)
-1675	-1655	8335	(-)	Drosophila PAX6 P3 homeodomain binding site		12200	12190 - 12210	(-)	heat shock factor (Drosophila)
-1645	-1633	8361	(+)	fushi tarazu, involved in body segmentation of the drosophila embryo		12258	12254 - 12262	(+)	CF2-II, Zinc finger splice variant II
-1643	-1627	8365	(+)	Broad-Complex Z2 Zinc Finger isoform		12264	12258 - 12270	(+)	Crocodile regulator of head development, member of fork head domain protein family
-1613	-1597	8395	(+)	Broad-Complex Z2 Zinc Finger isoform		12290	12282 - 12298	(+)	Broad-Complex Z4 Zinc Finger isoform
-1579	-1569	8426	(+)	Dorsal, protein for dorso-ventral axis formation, homologous to vertebrate c-rel		12304	12299 - 12309	(+)	Dorsal, protein for dorso-ventral axis formation, homologous to vertebrate c-rel
-1561	-1553	8443	(-)	chorion factor 1, homologous to retinoid X receptor		12432	12427 - 12437	(+)	Dorsal, protein for dorso-ventral axis formation, homologous to vertebrate c-rel
		8453		Ets sites		12489	12484 - 12494	(+)	Dorsal, protein for dorso-ventral axis formation, homologous to vertebrate c-rel
		8479				12524
-1478	-1470	8526	(-)	CF2-II, Zinc finger splice variant II		12555	12545 - 12565	(-)	heat shock factor (Drosophila)
		8537				12584
-1428	-1407	8572	(+)	Duf 1.5 FEx		12609	12609 - 12619	(-)	Hairy, transcriptional repressor
-1428	-1407	8593	(-)	Duf 1.5 RBx		12614	12609 - 12619	(-)	Hairy, transcriptional repressor
-1392	-1380	8614	(+)	Deformed, homeotic gene in drosophila development		12646	12642 - 12650	(+)	CF2-II, Zinc finger splice variant II
-1382	-1366	8626	(+)	Broad-Complex Z2 Zinc Finger isoform		12647	12643 - 12651	(-)	CF2-II, Zinc finger splice variant II
-1359	-1347	8647	(+)	fushi tarazu, involved in body segmentation of the drosophila embryo
-1352	-1344	8652	(+)	Drosophila gap gene tailless, involved in embryonic segmentation
-1291	-1275	8717	(+)	Broad-Complex Z1 Zinc Finger isoform
-1229	-1221	8775	(-)	CF2-II, Zinc finger splice variant II
-1228	-1220	8776	(+)	CF2-II, Zinc finger splice variant II
-1226	-1218	8778	(+)	CF2-II, Zinc finger splice variant II
-1227	-1215	8779	(-)	Crocodile regulator of head development, member of fork head domain protein family
-1220	-1212	8784	(+)	CF2-II, Zinc finger splice variant II
-1221	-1209	8785	(-)	Crocodile regulator of head development, member of fork head domain protein family
		8823		Brk repressor
		8828				12760
-1155	-1141	8852	(-)	E74A early ecdysone-inducible gene in onset of Drosophila metamorphosis		12785	12778 - 12792	(-)	E74A early ecdysone-inducible gene in onset of Drosophila metamorphosis
		8853				12785
		8855		Ets sites		12788			Ets sites
-1143	-1127	8865	(-)	Broad-Complex Z4 Zinc Finger isoform
-1139	-1129	8866	(+)	Drosophila homeodomain protein caudal, vertebrate homolog cdx
-1121	-1109	8885	(-)	Hunchback, early maternal and zygotic zinc finger gene, activated by bicoid
		8893				12850
-1093	-1081	8913	(+)	fushi tarazu, involved in body segmentation of the drosophila embryo		12871	12865 - 12877	(+)	fushi tarazu, involved in body segmentation of the drosophila embryo
-1037	-1025	8969	(+)	fushi tarazu, involved in body segmentation of the drosophila embryo		12927	12921 - 12933	(+)	fushi tarazu, involved in body segmentation of the drosophila embryo
		8974				12931
-984	-972	9022	(+)	Hunchback, early maternal and zygotic zinc finger gene, activated by bicoid		12953	12943 - 12963	(+)	heat shock factor (Drosophila)
-935	-912	9065	(+)	Duf 1 FEx		12958	12948 - 12968	(+)	heat shock factor (Drosophila)
-907	-891	9101	(+)	Drosophila Elf-1 (NTF-1), vertebrate homolog CP2 (human, mouse)
-901	-891	9104	(+)	Drosophila homeodomain protein caudal, vertebrate homolog cdx		12960			Ets sites
-886	-866	9124	(-)	heat shock factor (Drosophila)		12963	12953 - 12973	(+)	heat shock factor (Drosophila)
-832	-818	9175	(+)	GAGA factor encoded by the Trithorax-like gene (Trl)
-830	-816	9177	(+)	GAGA factor encoded by the Trithorax-like gene (Trl)
-828	-814	9179	(+)	GAGA factor encoded by the Trithorax-like gene (Trl)
-826	-812	9181	(+)	GAGA factor encoded by the Trithorax-like gene (Trl)
-824	-810	9183	(+)	GAGA factor encoded by the Trithorax-like gene (Trl)
-822	-808	9185	(+)	GAGA factor encoded by the Trithorax-like gene (Trl)
-820	-806	9187	(+)	GAGA factor encoded by the Trithorax-like gene (Trl)
-818	-804	9189	(+)	GAGA factor encoded by the Trithorax-like gene (Trl)
-816	-802	9191	(+)	GAGA factor encoded by the Trithorax-like gene (Trl)
-791	-777	9216	(+)	GAGA factor encoded by the Trithorax-like gene (Trl)
-743	-733	9262	(+)	Hairy, transcriptional repressor
-716	-706	9289	(+)	Dorsal, protein for dorso-ventral axis formation, homologous to vertebrate c-rel
-696	-684	9310	(+)	Suppressor of Hairless, linked to notch pathway		13003	12997 - 13009	(+)	Suppressor of Hairless, linked to notch pathway
-666	-656	9339	(+)	Dorsal, protein for dorso-ventral axis formation, homologous to vertebrate c-rel		13211	13206 - 13216	(+)	Krueppel, zinc finger protein, involved in body segmentation of the drosophila embryo
						13294	13286 - 13302	(+)	Drosophila Elf-1 (NTF-1), vertebrate homolog CP2 (human, mouse)
						13300	13296 - 13304	(+)	CF2-II, Zinc finger splice variant II
-639	-627	9367	(-)	Drosophila Doublesex (DSX), involved in sex determination)		13301	13297 - 13305	(-)	CF2-II, Zinc finger splice variant II
-622	-612	9383	(-)	Hairy, transcriptional repressor		13320	13315 - 13325	(+)	Hairy, transcriptional repressor
		9400	(+)	SalI site
		9414		Brk repressor		13329			Brk repressor
						13357	13350 - 13364	(-)	Snail zinc finger protein, involved in dorso-ventral patterning
						13357	13351 - 13363	(-)	Drosophila gap gene knirps, involved in embryonic segmentation
						13398	13393 - 13403	(-)	Hairy, transcriptional repressor
						13460	13450 - 13470	(-)	heat shock factor (Drosophila)
						13538	13531 - 13545	(+)	signal transducers and activators of transcription
		9441		Mad site		13538	13531 - 13545	(-)	signal transducers and activators of transcription
		9461				13540
-528	-514	9479	(+)	Snail zinc finger protein, involved in dorso-ventral patterning
		9484				13563
-511	-499	9495	(+)	Deformed, homeotic gene in drosophila development
-500	-490	9500	(-)	Hairy, repressor
-500	-490	9505	(-)	Hairy, transcriptional repressor
-415	-395	9595	(-)	Drosophila paired homeodomain
-387	-371	9621	(+)	Broad-Complex Z1 Zinc Finger isoform
-350	-340	9655	(+)	Drosophila homeodomain protein caudal, vertebrate homolog cdx
-329	-317	9677	(+)	Drosophila gap gene knirps, involved in embryonic segmentation
-319	-307	9687	(-)	Deformed, homeotic gene in drosophila development
-316	-304	9690	(+)	Deformed, homeotic gene in drosophila development
-272	-252	9738	(-)	Drosophila paired homeodomain
-183	-171	9823	(+)	Hunchback, early maternal and zygotic zinc finger gene, activated by bicoid
-174	-162	9832	(-)	Deformed, homeotic gene in drosophila development
-171	-159	9835	(+)	Deformed, homeotic gene in drosophila development
-170	-158	9836	(-)	Deformed, homeotic gene in drosophila development
-160	-148	9846	(-)	Hunchback, early maternal and zygotic zinc finger gene, activated by bicoid
		9925		Ets sites
-41	-29	9965	(+)	Hunchback, early maternal and zygotic zinc finger gene, activated by bicoid
	0	10000	(+)	duf star site
89	112	10112	(-)	Duf RBx
